# Supplementary material for: 18FDG-PET/CT-Scans and Biomarker Levels Predicting Clinical Outcome in Patients with Alveolar Echinococcosis—A Single-Center Cohort Study with 179 Patients
Source: MDPI journal article supplement (doi:10.3390/pathogens12081041), 2023-08-14
Supplement: s1 [file s1]

## Supplementary material

### S1. Biomarkers in relation to clinical status

Patients without follow-up visit or with a follow-up period < 6 months were excluded.

| Laboratory values      | Cured                                                                                              | Stable without BMZ                                                                                 | Stable with BMZ                                                                                    | Progressive disease                                                                               | Statistical analysis (Kruskal-Wallis-Test) |
|------------------------|----------------------------------------------------------------------------------------------------|----------------------------------------------------------------------------------------------------|----------------------------------------------------------------------------------------------------|---------------------------------------------------------------------------------------------------|--------------------------------------------|
| SAA, mg/L              | n = 36<br>M = 15.05<br>SD = 55.73<br>MD = 3.15<br>IQR = 4.28<br>Min = 0.80<br>Max = 335.00         | n = 37<br>M = 10.10<br>SD = 23.80<br>MD = 2.60<br>IQR = 10.60<br>Min = 0.80<br>Max = 146.00        | n = 71<br>M = 6.68<br>SD = 14.02<br>MD = 3.20<br>IQR = 4.60<br>Min = 0.80<br>Max = 115.00          | n = 6<br>M = 3.33<br>SD = 2.29<br>MD = 2.85<br>IQR = 3.83<br>Min = 0.80<br>Max = 7.10             | $X^2(3) = 0.796$ ;<br>$p = 0.850$          |
| CRP, mg/L              | n = 34<br>M = 10.29<br>SD = 35.76<br>MD = 1.85<br>IQR = 5.93<br>Min = 0.20<br>Max = 210.30         | n = 36<br>M = 5.49<br>SD = 8.71<br>MD = 1.60<br>IQR = 5.95<br>Min = 0.30<br>Max = 44.00            | n = 69<br>M = 4.97<br>SD = 6.43<br>MD = 2.50<br>IQR = 4.70<br>Min = 0.20<br>Max = 29.30            | n = 6<br>M = 6.53<br>SD = 6.23<br>MD = 4.00<br>IQR = 12.25<br>Min = 0.60<br>Max = 15.40           | $X^2(3) = 1.637$ ;<br>$p = 0.651$          |
| sIL-2R, U/ml           | n = 36<br>M = 320.00<br>SD = 183.40<br>MD = 261.50<br>IQR = 213.75<br>Min = 121.00<br>Max = 904.00 | n = 37<br>M = 291.43<br>SD = 168.18<br>MD = 243.00<br>IQR = 186.50<br>Min = 112.00<br>Max = 846.00 | n = 71<br>M = 310.90<br>SD = 194.35<br>MD = 266.00<br>IQR = 180.00<br>Min = 51.90<br>Max = 1252.00 | n = 6<br>M = 286.33<br>SD = 141.41<br>MD = 267.50<br>IQR = 169.25<br>Min = 147.00<br>Max = 554.00 | $X^2(3) = 0.621$ ;<br>$p = 0.892$          |
| Ck18F(M30), U/L        | n = 34<br>M = 140.05<br>SD = 60.50<br>MD = 126.58<br>IQR = 42.25<br>Min = 30.57<br>Max = 349.04    | n = 36<br>M = 48.90<br>SD = 85.58<br>MD = 12.04<br>IQR = 90.14<br>Min = 68.91<br>Max = 523.85      | n = 69<br>M = 176.00<br>SD = 202.47<br>MD = 128.70<br>IQR = 82.88<br>Min = 66.92<br>Max = 1711.40  | n = 6<br>M = 151.53<br>SD = 39.46<br>MD = 159.07<br>IQR = 73.79<br>Min = 93.96<br>Max = 193.47    | $X^2(3) = 1.588$ ;<br>$p = 0.662$          |
| Ck18F(M65), U/L        | n = 34<br>M = 275.20<br>SD = 269.28<br>MD = 184.06<br>IQR = 204.08<br>Min = 40.13<br>Max = 1142.70 | n = 36<br>M = 256.17<br>SD = 309.80<br>MD = 92.92<br>IQR = 200.27<br>Min = 37.49<br>Max = 1870.20  | n = 69<br>M = 344.29<br>SD = 543.83<br>MD = 200.00<br>IQR = 191.16<br>Min = 27.95<br>Max = 4199.60 | n = 6<br>M = 289.50<br>SD = 196.66<br>MD = 274.60<br>IQR = 334.50<br>Min = 70.99<br>Max = 605.12  | $X^2(3) = 2.960$ ;<br>$p = 0.398$          |
| Ratio Ck 18F (M30:M65) | n = 34<br>M = 0.91<br>SD = 0.75<br>MD = 0.63<br>IQR = 0.76<br>Min = 0.13                           | n = 36<br>M = 0.99<br>SD = 1.08<br>MD = 0.72<br>IQR = 0.65<br>Min = 0.20                           | n = 69<br>M = 0.82<br>SD = 0.75<br>MD = 0.63<br>IQR = 0.58<br>Min = 0.12                           | n = 6<br>M = 0.74<br>SD = 0.43<br>MD = 0.64<br>IQR = 0.87<br>Min = 0.32                           | $X^2(3) = 1.512$ ;<br>$p = 0.680$          |

|                           |                                                                                                |                                                                                                   |                                                                                                   |                                                                                                     |                                                     |
|---------------------------|------------------------------------------------------------------------------------------------|---------------------------------------------------------------------------------------------------|---------------------------------------------------------------------------------------------------|-----------------------------------------------------------------------------------------------------|-----------------------------------------------------|
|                           | Max = 3.46                                                                                     | Max = 6.56                                                                                        | Max = 4.88                                                                                        | Max = 1.32                                                                                          |                                                     |
| ECP, µg/L                 | n = 34<br>M = 4.37<br>SD = 3.46<br>MD = 2.85<br>IQR = 3.47<br>Min = 2.00<br>Max = 17.60        | n = 36<br>M = 3.85<br>SD = 3.05<br>MD = 2.95<br>IQR = 2.38<br>Min = 2.00<br>Max = 19.50           | n = 69<br>M = 3.90<br>SD = 2.71<br>MD = 3.10<br>IQR = 2.60<br>Min = 2.00<br>Max = 19.80           | n = 6<br>M = 4.25<br>SD = 2.52<br>MD = 2.95<br>IQR = 4.70<br>Min = 2.00<br>Max = 7.90               | $X^2(3) = 0.281$ ;<br>$p = 0.964$                   |
| EOS, G/L                  | n = 37<br>M = 0.12<br>SD = 0.10<br>MD = 0.10<br>IQR = 0.10<br>Min = 0.00<br>Max = 0.30         | n = 38<br>M = 0.15<br>SD = 0.11<br>MD = 0.10<br>IQR = 0.10<br>Min = 0.00<br>Max = 0.50            | n = 75<br>M = 0.16<br>SD = 0.11<br>MD = 0.10<br>IQR = 0.10<br>Min = 0.50<br>Max = 2.20            | n = 7<br>M = 0.19<br>SD = 0.07<br>MD = 0.20<br>IQR = 0.10<br>Min = 0.10<br>Max = 0.30               |                                                     |
| Specific IgE, kU/L        | n = 37<br>M = 1.16<br>SD = 3.58<br>MD = 0.12<br>IQR = 0.42<br>Min = 0.00<br>Max = 19.40        | n = 39<br>M = 1.50<br>SD = 5.47<br>MD = 0.14<br>IQR = 0.81<br>Min = 0.02<br>Max = 34.30           | n = 75<br>M = 4.08<br>SD = 7.00<br>MD = 1.57<br>IQR = 3.85<br>Min = 0.02<br>Max = 49.10           | n = 7<br>M = 5.38<br>SD = 7.94<br>MD = 0.69<br>IQR = 13.53<br>Min = 0.03<br>Max = 19.60             | $X^2(3) = 38.564$ ; $p < 0.001$                     |
| Total IgE, IU/ml          | n = 37<br>M = 100.65<br>SD = 198.85<br>MD = 21.50<br>IQR = 97.85<br>Min = 3.40<br>Max = 987.40 | n = 39<br>M = 516.96<br>SD = 2313.18<br>MD = 45.60<br>IQR = 60.00<br>Min = 1.60<br>Max = 14089.00 | n = 76<br>M = 580.53<br>SD = 870.64<br>MD = 234.65<br>IQR = 526.57<br>Min = 1.10<br>Max = 5251.00 | n = 7<br>M = 1252.96<br>SD = 2106.86<br>MD = 103.00<br>IQR = 1897.90<br>Min = 3.80<br>Max = 5750.00 | $X^2(3) = 40.856$ ; $p < 0.001$                     |
| IHA IgG, < 1:32 = '0'     | n = 37<br>MD = 0<br>P25 = 0<br>P75 = 0<br>Min = 0<br>Max = 128                                 | n = 38<br>MD = 0<br>P25 = 0<br>P75 = 32<br>Min = 0<br>Max = 1024                                  | n = 74<br>MD = 32<br>P25 = 0<br>P75 = 128<br>Min = 0<br>Max = 4096                                | n = 7<br>MD = 128<br>P25 = 0<br>P75 = 1024<br>Min = 0<br>Max = 1024                                 | $X^2(3) = 27.233$ ; $p < 0.001$                     |
| Em2 <sup>+</sup> negative | n = 33<br>(89.2%)                                                                              | n = 23<br>(60.0%)                                                                                 | n = 20<br>(26.3%)                                                                                 | n = 1<br>(14.2 %)                                                                                   | Chi-Square-test:<br>$X^2(3) = 44.805$ ; $p < 0.001$ |
| Em2 <sup>+</sup> positive | n = 4<br>(10.8%)                                                                               | n = 14<br>(35.9%)                                                                                 | n = 55<br>(72.4%)                                                                                 | n = 6<br>(85.7%)                                                                                    |                                                     |
| PET negative*             | /                                                                                              | n = 19<br>(48.7%)                                                                                 | n = 8 (10.5%)                                                                                     | n = 0 (0%)                                                                                          | Chi-Square-test:<br>$X^2(2) = 23.925$ ; $p < 0.001$ |
| PET positive*             | /                                                                                              | n = 20<br>(51.3%)                                                                                 | n = 68 (89.5%)                                                                                    | n = 7 (100%)                                                                                        |                                                     |

\*Operated patients excluded

BMZ=Benzimidazoles; SAA=serum amyloid A; CRP=C-reactive protein; sIL-2R=soluble interleukin 2 receptor; Ck18F(M30) and Ck18F(M65)=cytokeratin fragments; EOS=total eosinophilic cell count; ECP=eosinophil cationic protein; specific IgE=parasite-specific IgE; total IgE=total immunoglobulin E; IHA=indirect hemagglutination IgG titers against a crude

parasite extract; Em2+=antibody levels against Em2 antigen 2+, if the index  $\geq 1.0$  will be considered to be positive, otherwise negative; PET positive=CT scans visually having FDG uptake around the AE lesions above the background liver uptake/non-affected liver tissue; PET negative=AE lesion with no detectable FDG uptake.

## S2. Biomarkers and PET/CT results in relation to WHO stage of disease

| Laboratory values      | Stage I-II<br>(P1/2N0M0)                                                                  | Stage IIIa<br>(P3N0M0)                                                                  | Stage IIIb<br>(P1-3N1M0<br>P4N0M0)                                                       | Stage IV<br>(P4N1M0<br>P1-4N0/1M1)                                                       | Statistical analysis<br>(Kruskal-Wallis-Test) |
|------------------------|-------------------------------------------------------------------------------------------|-----------------------------------------------------------------------------------------|------------------------------------------------------------------------------------------|------------------------------------------------------------------------------------------|-----------------------------------------------|
| SAA, mg/L              | n = 35                                                                                    | n = 45                                                                                  | n = 39                                                                                   | n = 49                                                                                   | $X^2(3) = 1.148$ ;<br>$p = 0.765$             |
|                        | M = 9.17<br>SD = 20.10<br>MD = 2.50<br>IQR = 5.40<br>Min = 0.80<br>Max = 115.00           | M = 13.41<br>SD = 49.44<br>MD = 2.80<br>IQR = 6.80<br>Min = 0.80<br>Max = 335.00        | M = 8.45<br>SD = 23.32<br>MD = 3.10<br>IQR = 2.50<br>Min = 0.80<br>Max = 146.00          | M = 4.81<br>SD = 4.25<br>MD = 3.20<br>IQR = 4.90<br>Min = 0.80<br>Max = 18.70            |                                               |
| CRP, mg/L              | n = 32                                                                                    | n = 43                                                                                  | n = 38                                                                                   | n = 49                                                                                   | $X^2(3) = 0.952$ ;<br>$p = 0.813$             |
|                        | M = 4.60<br>SD = 6.23<br>MD = 1.65<br>IQR = 6.88<br>Min = 0.20<br>Max = 25.90             | M = 10.10<br>SD = 32.48<br>MD = 2.10<br>IQR = 4.70<br>Min = 0.20<br>Max = 210.30        | M = 4.67<br>SD = 5.27<br>MD = 2.75<br>IQR = 6.00<br>Min = 0.20<br>Max = 22.40            | M = 4.58<br>SD = 5.58<br>MD = 2.70<br>IQR = 4.35<br>Min = 0.30<br>Max = 29.30            |                                               |
| sIL-2R, U/ml           | n = 35                                                                                    | n = 45                                                                                  | n = 39                                                                                   | n = 49                                                                                   | $X^2(3) = 2.897$ ;<br>$p = 0.408$             |
|                        | M = 320.78<br>SD = 230.03<br>MD = 231.00<br>IQR = 173.00<br>Min = 132.00<br>Max = 1252.00 | M = 293.66<br>SD = 155.11<br>MD = 278.00<br>IQR = 192.00<br>Min = 84.40<br>Max = 846.00 | M = 266.63<br>SD = 150.11<br>MD = 229.00<br>IQR = 135.00<br>Min = 85.50<br>Max = 787.00  | M = 378.70<br>SD = 343.91<br>MD = 286.0<br>IQR = 238.00<br>Min = 91.00<br>Max = 2181.00  |                                               |
| Ck18F(M30), U/L        | n = 32                                                                                    | n = 43                                                                                  | n = 38                                                                                   | n = 49                                                                                   | $X^2(3) = 7.320$ ;<br>$p = 0.062$             |
|                        | M = 133.28<br>SD = 63.73<br>MD = 111.65<br>IQR = 63.20<br>Min = 76.14<br>Max = 349.04     | M = 138.17<br>SD = 61.80<br>MD = 128.69<br>IQR = 49.28<br>Min = 30.57<br>Max = 416.73   | M = 152.45<br>SD = 80.97<br>MD = 132.86<br>IQR = 64.94<br>Min = 67.80<br>Max = 488.52    | M = 197.20<br>SD = 235.00<br>MD = 132.90<br>IQR = 97.90<br>Min = 73.86<br>Max = 1711.40  |                                               |
| Ck18F(M65), U/L        | n = 32                                                                                    | n = 43                                                                                  | n = 38                                                                                   | n = 49                                                                                   | $X^2(3) = 4.496$ ;<br>$p = 0.213$             |
|                        | M = 265.46<br>SD = 234.96<br>MD = 230.88<br>IQR = 227.95<br>Min = 51.10<br>Max = 1142.70  | M = 214.03<br>SD = 155.95<br>MD = 176.04<br>IQR = 101.09<br>Min = 40.13<br>Max = 725.42 | M = 267.87<br>SD = 326.08<br>MD = 169.24<br>IQR = 192.59<br>Min = 37.49<br>Max = 1988.40 | M = 403.70<br>SD = 636.63<br>MD = 248.27<br>IQR = 226.87<br>Min = 37.49<br>Max = 4199.60 |                                               |
| Ratio Ck 18F (M30:M65) | n = 32                                                                                    | n = 43                                                                                  | n = 38                                                                                   | n = 49                                                                                   | $X^2(3) = 2.262$ ;<br>$p = 0.520$             |
|                        | M = 0.78<br>SD = 0.57<br>MD = 0.54<br>IQR = 0.62<br>Min = 0.24<br>Max = 2.13              | M = 0.95<br>SD = 0.76<br>MD = 0.73<br>IQR = 0.73<br>Min = 0.19<br>Max = 3.46            | M = 0.95<br>SD = 0.73<br>MD = 0.83<br>IQR = 0.70<br>Min = 0.12<br>Max = 3.63             | M = 0.87<br>SD = 0.98<br>MD = 0.53<br>IQR = 0.64<br>Min = 0.13<br>Max = 6.56             |                                               |
| ECP                    | n = 32                                                                                    | n = 43                                                                                  | n = 38                                                                                   | n = 49                                                                                   | $X^2(3) = 2.630$ ;                            |
|                        | M = 3.66                                                                                  | M = 3.25                                                                                | M = 4.34                                                                                 | M = 4.50                                                                                 |                                               |

|                           |                                                                                          |                                                                                       |                                                                                        |                                                                                          |                                                   |
|---------------------------|------------------------------------------------------------------------------------------|---------------------------------------------------------------------------------------|----------------------------------------------------------------------------------------|------------------------------------------------------------------------------------------|---------------------------------------------------|
|                           | SD = 1.84<br>MD = 2.85<br>IQR = 3.15<br>Min = 2.0<br>Max = 7.70                          | SD = 1.39<br>MD = 2.00<br>IQR = 1.90<br>Min = 2.00<br>Max = 7.70                      | SD = 3.29<br>MD = 3.10<br>IQR = 3.45<br>Min = 2.00<br>Max = 17.60                      | SD = 3.76<br>MD = 3.60<br>IQR = 3.00<br>Min = 2.00<br>Max = 19.80                        | $p = 0.452$                                       |
| EOS, $\mu\text{g/L}$      | n= 36                                                                                    | n = 47                                                                                | n = 43                                                                                 | n= 50                                                                                    | $X^2(3) = 2.630$ ;<br>$p = 0.452$                 |
|                           | M = 0.14<br>SD = 0.11<br>MD = 0.10<br>IQR = 0.10<br>Min = 0.00<br>Max = 0.50             | M = 0.16<br>SD = 0.14<br>MD = 0.10<br>IQR = 0.10<br>Min = 0.00<br>Max = 0.90          | M = 0.18<br>SD = 0.33<br>MD = 0.10<br>IQR = 0.10<br>Min = 0.00<br>Max = 2.20           | M = 0.17<br>SD = 0.12<br>MD = 0.20<br>IQR = 0.13<br>Min = 0.00<br>Max = 0.50             |                                                   |
| Specific IgE,<br>kU/L     | n = 37                                                                                   | n = 48                                                                                | n = 42                                                                                 | n = 50                                                                                   | $X^2(3) = 10.442$ ;<br>$p = 0.015$                |
|                           | M = 3.52<br>SD = 7.77<br>MD = 0.35<br>IQR = 1.43<br>Min = 0.00<br>Max = 34.40            | M = 2.01<br>SD = 4.29<br>MD = 0.43<br>IQR = 1.78<br>Min = 0.02<br>Max = 21.10         | M = 1.68<br>SD = 3.02<br>MD = 0.43<br>IQR = 1.72<br>Min = 0.01<br>Max = 12.50          | M = 4.24<br>SD = 8.07<br>MD = 1.03<br>IQR = 3.93<br>Min = 0.03<br>Max = 49.10            |                                                   |
| Total IgE,<br>IU/ml       | n = 37                                                                                   | n = 48                                                                                | n = 42                                                                                 | Nn= 50                                                                                   | $X^2(3) = 14.137$ ;<br>$p = 0.003$                |
|                           | M = 608.03<br>SD = 2311.86<br>MD = 57.00<br>IQR = 279.50<br>Min = 1.10<br>Max = 14089.00 | M = 199.75<br>SD = 398.43<br>MD = 71.75<br>IQR = 97.48<br>Min = 2.20<br>Max = 1941.00 | M = 272.00<br>SD = 518.11<br>MD = 61.25<br>IQR = 260.67<br>Min = 1.14<br>Max = 2570.00 | M = 755.64<br>SD = 1289.44<br>MD = 235.20<br>IQR = 572.82<br>Min = 2.20<br>Max = 5750.00 |                                                   |
| IHA IgG,<br>< 1:32 = '0'  | n = 35                                                                                   | n = 46                                                                                | n = 41                                                                                 | n = 50                                                                                   | $X^2(3) = 13.705$ ;<br>$p = 0.003$                |
|                           | MD = 0<br>P25 = 0<br>P75 = 32<br>Min = 0<br>Max = 1024                                   | MD = 0<br>P25 = 0<br>P75 = 40<br>Min = 0<br>Max = 2048                                | MD = 0<br>P25 = 0<br>P75 = 32<br>Min = 0<br>Max = 8192                                 | MD = 32<br>P25 = 0<br>P75 = 256<br>Min = 0<br>Max = 4096                                 |                                                   |
| Em2 <sup>+</sup> negative | 23 (62.2%)                                                                               | 26 (54.2%)                                                                            | 20 (47.6%)                                                                             | 12 (24.0%)                                                                               | Chi-Square:<br>$X^2(3) = 16.472$ ;<br>$p < 0.001$ |
| Em2 <sup>+</sup> positive | 13 (35.1%)                                                                               | 20 (41.7%)                                                                            | 21 (50.0%)                                                                             | 38 (76.0%)                                                                               |                                                   |
| PET negative*             | 7 (35.0%)                                                                                | 14 (35.9%)                                                                            | 7 (19.4%)                                                                              | 4 (9.1%)                                                                                 | Chi-Square:<br>$X^2(3) = 10.346$ ;<br>$p < 0.016$ |
| PET positive*             | 13 (65.0%)                                                                               | 25 (64.1%)                                                                            | 29 (80.6%)                                                                             | 40 (90.9%)                                                                               |                                                   |

\*Operated patients excluded

BMZ=Benzimidazoles; SAA=serum amyloid A; CRP=C-reactive protein; sIL-2R=soluble interleukin 2 receptor; Ck18F(M30) and Ck18F(M65)=cytokeratin fragments; EOS=total eosinophilic cell count; ECP=eosinophil cationic protein; specific IgE=parasite-specific IgE; total IgE=total immunoglobulin E; IHA=indirect hemagglutination IgG titers against a crude parasite extract; Em2<sup>+</sup>=antibody levels against Em2 antigen 2<sup>+</sup>, if the index  $\geq 1.0$  will be considered to be positive, otherwise negative; PET positive=CT scans visually having FDG

uptake around the AE lesions above the background liver uptake/non-affected liver tissue;  
PET negative=AE lesion with no detectable FDG uptake.

### S3. Biomarkers in relation to PET/CT results

Patients who had undergone surgery (n = 38) were excluded from this analysis.

| Laboratory values      | PET/CT scan                                                                              |                                                                                          | Mann-Whitney-U-test      |
|------------------------|------------------------------------------------------------------------------------------|------------------------------------------------------------------------------------------|--------------------------|
|                        | positive                                                                                 | negative                                                                                 |                          |
| SAA, mg/L              | n = 102                                                                                  | n = 31                                                                                   | U = 1357.50; $p = 0.234$ |
|                        | M = 7.40<br>SD = 18.42<br>MD = 2.80<br>IQR = 4.72<br>Min = 0.80<br>Max = 146.20          | M = 6.31<br>SD = 5.88<br>MD = 4.20<br>IQR = 6.90<br>Min = 0.80<br>Max = 25.50            |                          |
| CRP, mg/L              | n = 99                                                                                   | n = 30                                                                                   | U = 1361.00; $p = 0.489$ |
|                        | M = 5.30<br>SD = 7.51<br>MD = 2.50<br>IQR = 4.90<br>Min = 0.20<br>Max = 44.00            | M = 3.67<br>SD = 3.86<br>MD = 1.85<br>IQR = 5.18<br>Min = 0.20<br>Max = 14.30            |                          |
| sIL-2R, U/ml           | n = 102                                                                                  | n = 31                                                                                   | U = 1415; $p = 0.489$    |
|                        | M = 328.83<br>SD = 277.60<br>MD = 264.00<br>IQR = 177.50<br>Min = 51.90<br>Max = 2181.00 | M = 277.52<br>SD = 153.00<br>MD = 228.00<br>IQR = 178.00<br>Min = 112.00<br>Max = 774.00 |                          |
| CK18F(M30), U/L        | n = 99                                                                                   | n = 30                                                                                   | U = 1400.00; $p = 0.636$ |
|                        | M = 168.31<br>SD = 174.67<br>MD = 129.60<br>IQR = 78.70<br>Min = 66.92<br>Max = 1711.40  | M = 147.35<br>SD = 72.83<br>MD = 126.12<br>IQR = 77.74<br>Min = 73.86<br>Max = 41673.00  |                          |
| CK18F(M65), U/L        | n = 99                                                                                   | n = 30                                                                                   | U = 1255.50; $p = 0.201$ |
|                        | M = 325.77<br>SD = 494.44<br>MD = 198.41<br>IQR = 211.31<br>Min = 27.95<br>Max = 4199.60 | M = 196.50<br>SD = 111.44<br>MD = 180.94<br>IQR = 133.79<br>Min = 37.49<br>Max = 540.90  |                          |
| Ratio Ck 18F (M30:M65) | n = 99                                                                                   | n = 30                                                                                   | U = 1270.00; $p = 0.231$ |
|                        | M = 0.89<br>SD = 0.78<br>MD = 0.63<br>IQR = 0.73<br>Min = 0.12<br>Max = 4.88             | M = 1.05<br>SD = 1.14<br>MD = 0.77<br>IQR = 0.59<br>Min = 0.23<br>Max = 6.56             |                          |
| ECP, µg/L              | n = 99                                                                                   | n = 30                                                                                   | U = 1426.00; $p = 0.741$ |
|                        | M = 3.89<br>SD = 2.85                                                                    | M = 3.68<br>SD = 1.99                                                                    |                          |

|                           |                                                                                        |                                                                                  |                                               |
|---------------------------|----------------------------------------------------------------------------------------|----------------------------------------------------------------------------------|-----------------------------------------------|
|                           | MD = 2.90<br>IQR = 2.70<br>Min = 2.00<br>Max = 19.80                                   | MD = 3.00<br>IQR = 2.45<br>Min = 2.00<br>Max = 8.20                              |                                               |
| EOS, G/l                  | n = 107                                                                                | n = 32                                                                           | U = 1469.00; <i>p</i> = 0.200                 |
|                           | M = 0.19<br>SD = 0.24<br>MD = 0.10<br>IQR = 0.10<br>Min = 0.00<br>Max = 2.20           | M = 0.13<br>SD = 0.09<br>MD = 0.10<br>IQR = 0.10<br>Min = 0.00<br>Max = 0.30     |                                               |
| specific IgE, kU/L        | N = 107                                                                                | N = 33                                                                           | U = 995.00; <i>p</i> < 0.001                  |
|                           | M = 4.11<br>SD = 7.44<br>MD = 1.18<br>IQR = 3.37<br>Min = 0.01<br>Max = 49.10          | M = 0.85<br>SD = 1.53<br>MD = 0.17<br>IQR = 0.82<br>Min = 0.02<br>Max = 7.63     |                                               |
| IgE total, IU/L           | n = 107                                                                                | n = 33                                                                           | U = 785.50; <i>p</i> < 0.001                  |
|                           | M = 706.05<br>SD = 1637.33<br>MD = 185.30<br>IQR = 548.90<br>Min = 1.14<br>Max 14089.0 | M = 79.24<br>SD = 119.85<br>MD = 46.3<br>IQR = 72.85<br>Min = 1.10<br>Max 576.30 |                                               |
| IHA IgG,<br>< 1:32 = '0'  | n = 105                                                                                | n = 31                                                                           | U = 1058.50; <i>p</i> = 0.001                 |
|                           | MD = 32<br>P25 = 0<br>P75 = 256<br>Min = 0<br>Max = 8292                               | MD = 0<br>P25 = 0<br>P75 = 32<br>Min = 0<br>Max = 256                            |                                               |
| Em2 <sup>+</sup> negative | n = 27 (25.2%)                                                                         | n = 21 (63.6%)                                                                   | Chi-Square-test                               |
| Em2 <sup>+</sup> positive | n = 78 (72.9%)                                                                         | n = 10 (30.3%)                                                                   | X <sup>2</sup> (1) = 18.511; <i>p</i> < 0.001 |

BMZ=Benzimidazoles; SAA=serum amyloid A; CRP=C-reactive protein; sIL-2R=soluble interleukin 2 receptor; Ck18F(M30) and Ck18F(M65)=cytokeratin fragments; EOS=total eosinophilic cell count; ECP=eosinophil cationic protein; specific IgE=parasite-specific IgE; total IgE=total immunoglobulin E; IHA=indirect hemagglutination IgG titers against a crude parasite extract; Em2<sup>+</sup>=antibody levels against Em2 antigen 2<sup>+</sup>, if the index ≥1.0 will be considered to be positive, otherwise negative;
